# Supplementary material for: Ocular mycobacterial lesions in cats
Source: PubMed Central journal article supplement (PMC9358306; doi:10.1177/03009858221098431), 2022-05-19
Supplement: sj-pdf-1-vet-10.1177_03009858221098431.pdf [file sj-pdf-1-vet-10.1177_03009858221098431.pdf]

*Veterinary Pathology: Supplemental Materials*  
Mitchell et al. Ocular mycobacterial lesions in cats.

Supplemental Table S1: Summary of case details for cats involved in this study.

| Case No. | Age    | Gender | Breed   | Culture           | PCR                    | IGRA            | FeLV antigen | FIV antibody | Stavinohova <i>et al.</i> * Case No. |
|----------|--------|--------|---------|-------------------|------------------------|-----------------|--------------|--------------|--------------------------------------|
| 1        | 6y     | MN     | Bengal  | <i>M. bovis</i>   | Negative               | <i>M. bovis</i> | Negative     | Negative     | 10                                   |
| 2        | 8y     | FN     | DSH     | <i>M. microti</i> | NP                     | MTBC            | NP           | NP           | 6                                    |
| 3        | 11y    | MN     | DSH     | <i>M. microti</i> | NP                     | MTBC            | NP           | NP           | -                                    |
| 4        | 10y    | MN     | BSH     | NP                | <i>M. bovis</i>        | NP              | NA           | NA           | 20                                   |
| 5        | 4y     | F      | DxH     | NP                | <i>M. bovis</i>        | NP              | NA           | NA           | -                                    |
| 6        | 8y     | MN     | DSH     | NP                | <i>M. bovis</i>        | NP              | NA           | NA           | 21                                   |
| 7        | 7y     | F      | DxH     | NP                | <i>M. bovis</i>        | NP              | NA           | NA           | -                                    |
| 8        | 1y     | M      | NA      | NP                | <i>M. bovis</i>        | NP              | NA           | NA           | -                                    |
| 9        | 5y 4m  | FN     | DSH     | NP                | <i>M. bovis</i>        | NP              | NA           | NA           | -                                    |
| 10       | 10y 5m | MN     | DSH     | NP                | MTBC                   | <i>M. bovis</i> | Negative     | Negative     | -                                    |
| 11       | 3y     | FN     | DSH     | NP                | MTBC                   | MTBC            | NP           | NP           | -                                    |
| 12       | 7y     | MN     | DSH     | NP                | MTBC                   | MTBC            | NP           | NP           | -                                    |
| 13       | 4y     | MN     | DSH     | NP                | MTBC                   | NP              | NA           | NA           | 14                                   |
| 14       | 2y     | MN     | DSH     | NP                | MTBC                   | NP              | NA           | NA           | 17                                   |
| 15       | 6y     | MN     | BSH     | NP                | MTBC                   | NP              | NA           | NA           | 18                                   |
| 16       | 11y    | M      | DSH     | NP                | MTBC                   | NP              | NA           | NA           | -                                    |
| 17       | 7y 2m  | MN     | Burmese | NP                | NP                     | <i>M. bovis</i> | Negative     | Negative     | 3                                    |
| 18       | 1y 9m  | MN     | DSH     | Negative          | Negative               | <i>M. bovis</i> | NP           | NP           | 2                                    |
| 19       | 2y 1m  | FN     | DSH     | NP                | NP                     | <i>M. bovis</i> | Negative     | Negative     | -                                    |
| 20       | 2y     | FN     | BSH     | NP                | NP                     | MTBC            | NP           | NP           | -                                    |
| 21       | 12y 6m | FN     | DLH     | NP                | <i>M. lepraemurium</i> | NP              | NA           | NA           | -                                    |
| 22       | 10y    | F      | DxH     | NP                | <i>M. lepraemurium</i> | NP              | NA           | NA           | -                                    |
| 23       | 3y     | FN     | DLH     | NP                | NP                     | NP              | NP           | NP           | -                                    |
| 24       | 1y 6m  | FN     | DSH     | NP                | NP                     | NP              | NP           | NP           | 22                                   |

PCR = polymerase chain reaction, IGRA = interferon-gamma release assay, FeLV = feline leukaemia virus, FIV = feline immunodeficiency virus, y = years, m = months, M = male, F = female, N = neutered, DSH = domestic short-hair, DxH = domestic cat, DLH = domestic long-hair, BSH = British Shorthair, MTBC = *Mycobacterium tuberculosis*-complex, NP = not performed, NA = data not available

\*Stavinohova R, O'Halloran C, Newton JR, Oliver JAC, Scurrill E, Gunn-Moore, DA. Feline Ocular Mycobacteriosis: Clinical Presentation, Histopathologic Features, and Outcome. *Veterinary Pathology*. 2019;56: 749-760.

*Veterinary Pathology: Supplemental Materials*  
Mitchell et al. Ocular mycobacterial lesions in cats.

Supplemental Table S2: Breakdown of inflammation score, inflammation type and bacterial index grade per tissue examined per case.

| Case No. | Cornea |    |    | Conjunctiva |    |    | Sclera |    |    | Iris |    |    | Ciliary Body |    |    | Choroid |    |    | Retina |    |    | Optic Nerve |    |    |
|----------|--------|----|----|-------------|----|----|--------|----|----|------|----|----|--------------|----|----|---------|----|----|--------|----|----|-------------|----|----|
|          | IS     | IT | BI | IS          | IT | BI | IS     | IT | BI | IS   | IT | BI | IS           | IT | BI | IS      | IT | BI | IS     | IT | BI | IS          | IT | BI |
| 1        | -      | -  | -  | -           | -  | -  | 3      | PG | 4  | -    | -  | -  | 1            | L  | 0  | 5       | PG | 4  | 2      | PG | 0  | 3           | M  | 0  |
| 2        | 5      | PG | 3  | 3           | M  | 2  | 3      | M  | 4  | 2    | L  | 0  | 4            | M  | 3  | 4       | M  | 4  | 2      | PG | 0  | -           | -  | -  |
| 3        | -      | -  | -  | 5           | PG | 4  | -      | -  | -  | -    | -  | -  | -            | -  | -  | -       | -  | -  | -      | -  | -  | -           | -  | -  |
| 4        | -      | -  | -  | 2           | M  | 0  | 5      | PG | 2  | 2    | L  | 0  | 3            | M  | 0  | 5       | M  | 3  | 2      | M  | 3  | NP          | -  | -  |
| 5        | -      | -  | -  | -           | -  | -  | 1      | M  | 0  | 2    | L  | 0  | 2            | M  | 0  | 4       | M  | 3  | 4      | M  | 2  | NP          | -  | -  |
| 6        | -      | -  | -  | -           | -  | -  | 1      | M  | 0  | 2    | M  | 0  | 3            | PG | 4  | 3       | PG | 4  | 2      | M  | 4  | 3           | PG | 3  |
| 7        | -      | -  | -  | -           | -  | -  | 3      | PG | 0  | 2    | L  | 0  | 3            | M  | 0  | 5       | PG | 5  | 3      | PG | 4  | 3           | PG | 0  |
| 8        | -      | -  | -  | -           | -  | -  | 2      | PG | 2  | -    | -  | -  | 1            | PG | 0  | 5       | PG | 5  | 3      | PG | 5  | 5           | PG | 5  |
| 9        | 2      | PG | 0  | 5           | PG | 5  | 5      | PG | 4  | 3    | M  | 3  | 5            | PG | 4  | 5       | PG | 4  | 3      | PG | 3  | 2           | L  | 0  |
| 10       | -      | -  | -  | 1           | L  | 0  | 1      | M  | 0  | 1    | L  | 0  | 2            | L  | 0  | 5       | M  | 4  | 3      | M  | 3  | -           | -  | -  |
| 11       | -      | -  | -  | -           | -  | -  | -      | -  | -  | 2    | L  | 0  | 3            | PG | 3  | 4       | M  | 3  | 4      | M  | 0  | -           | -  | -  |
| 12       | -      | -  | -  | 2           | M  | 0  | 5      | PG | 0  | 1    | L  | 0  | 5            | PG | 1  | 5       | M  | 1  | 2      | L  | 0  | 5           | PG | 0  |
| 13       | -      | -  | -  | 1           | M  | 0  | 1      | M  | 0  | 1    | L  | 0  | 1            | L  | 0  | 5       | PG | 3  | 4      | M  | 0  | 2           | PG | 0  |
| 14       | -      | -  | -  | -           | -  | -  | 2      | M  | 0  | 1    | L  | 0  | 2            | M  | 0  | 3       | M  | 2  | 4      | PG | 0  | 2           | M  | 0  |
| 15       | -      | -  | -  | -           | -  | -  | -      | -  | -  | 3    | PG | 0  | 2            | L  | 0  | -       | -  | -  | -      | -  | -  | -           | -  | -  |
| 16       | 4      | PG | 0  | 4           | PG | 0  | 5      | PG | 3  | 2    | L  | 0  | 3            | PG | 0  | 3       | PG | 0  | 2      | L  | 0  | -           | -  | -  |
| 17       | -      | -  | -  | -           | -  | -  | 2      | M  | 0  | 5    | PG | 2  | 5            | PG | 4  | 5       | M  | 2  | 4      | PG | 3  | -           | -  | -  |
| 18       | 1      | L  | 0  | -           | -  | -  | 2      | M  | 0  | 2    | M  | 0  | 4            | M  | 0  | 3       | PG | 0  | 3      | M  | 2  | -           | -  | -  |
| 19       | -      | -  | -  | -           | -  | -  | 3      | PG | 0  | -    | -  | -  | 2            | PG | 0  | 5       | PG | 1  | 3      | L  | 0  | -           | -  | -  |
| 20       | -      | -  | -  | -           | -  | -  | 2      | M  | 0  | -    | -  | -  | 1            | L  | 0  | 5       | M  | 1  | 3      | L  | 0  | 2           | M  | 0  |
| 21       | 3      | PG | 5  | -           | -  | -  | 2      | PG | 5  | -    | -  | -  | -            | -  | -  | -       | -  | -  | -      | -  | -  | NP          | -  | -  |
| 22       | 2      | PG | 0  | 2           | PG | 0  | 4      | PG | 0  | -    | -  | -  | -            | -  | -  | -       | -  | -  | -      | -  | -  | NP          | -  | -  |
| 23       | -      | -  | -  | 2           | M  | 0  | -      | -  | -  | 2    | L  | 0  | 2            | M  | 0  | 3       | M  | 0  | 3      | M  | 0  | 2           | L  | 0  |
| 24       | -      | -  | -  | -           | -  | -  | 2      | M  | 0  | -    | -  | -  | -            | -  | -  | 5       | M  | 0  | 3      | M  | 0  | 2           | M  | 0  |

IS = inflammation score. IT = inflammation type. BI = bacterial index grade. PG = (pyo)granulomatous. M = mixed (pyo)granulomatous and lymphoplasmacytic inflammation. L = lymphoplasmacytic inflammation. NP = not present. - = not graded due to no inflammation present
